# Supplementary material
Source: publisher figshare collection journal article supplement (https://sage.figshare.com/ndownloader/files/15253751)
Supplement: Supplementary file 1 [file 15253751]

# Acceptable attitudes and the limits of tolerance: Understanding public attitudes to conscientious objection in healthcare

## Online appendix

**Table X.** Demographic characteristics of respondents

| Characteristic     |                                 | Unweighted (N, (%)) | Weighted (N, (%)) |
|--------------------|---------------------------------|---------------------|-------------------|
| Gender             | Female                          | 811 (50.2)          | 804 (49.7)        |
|                    | Male                            | 806 (49.8)          | 813 (50.3)        |
| Age                | 18-24                           | 110 (6.8)           | 193 (11.9)        |
|                    | 25-34                           | 233(14.4)           | 282 (17.5)        |
|                    | 35-44                           | 254 (15.7)          | 289 (17.9)        |
|                    | 45-54                           | 308 (19.0)          | 287 (17.7)        |
|                    | 55+                             | 712 (44.0)          | 567 (35.0)        |
|                    | Unanswered                      |                     |                   |
| Level of education | Primary school                  | 74 (4.6)            | 74 (4.6)          |
|                    | Upper secondary school          | 396 (24.5)          | 430 (26.7)        |
|                    | College/university $\leq 3$ yrs | 460 (28.5)          | 443 (27.5)        |
|                    | College/university $> 3$ yrs    | 658 (40.7)          | 647 (40.2)        |
|                    | Unanswered                      | 18 (1.1)            | 15 (0.9)          |
| Religious beliefs  | Non-religious                   | 728 (45.0)          | 753 (46.7)        |
|                    | Christian                       | 710 (43.9)          | 685 (42.5)        |
|                    | Other religions                 | 26 (1.6)            | 26 (1.6)          |
|                    | Unanswered                      | 148 (9.2)           | 149 (9.2)         |
